# Supplementary material
Source: PubMed Central journal article supplement (PMC5899074)
Supplement: NIHMS954325-supplement-Supp_File.pdf [file NIHMS954325-supplement-Supp_File.pdf]

Table 7. Bivariate association of anxiety, depression and body image score with SFQ scores in men at follow-up

|                              | HADS anxiety |       | HADS depression |       | Body image |       |
|------------------------------|--------------|-------|-----------------|-------|------------|-------|
|                              | Coeff.       | P     | Coeff.          | P     | Coeff.     | P     |
| HADS anxiety                 | 1.0          |       | 0.369           | 0.023 | 0.399      | 0.013 |
| HADS depression              | 0.369        | 0.023 | 1.0             |       | 0.095      | 0.570 |
| Body image                   | 0.399        | 0.013 | 0.095           | 0.570 | 1.0        |       |
| <b>SFQ subscales, coeff.</b> |              |       |                 |       |            |       |
| Overall                      | -0.230       | 0.170 | -0.522          | 0.001 | -0.260     | 0.224 |
| Interest                     | -0.070       | 0.678 | -0.313          | 0.055 | 0.047      | 0.779 |
| Desire                       | -0.060       | 0.210 | -0.308          | 0.134 | -0.390     | 0.054 |
| Arousal                      | -0.156       | 0.409 | -0.156          | 0.409 | -0.335     | 0.071 |
| Orgasm                       | -0.416       | 0.048 | -0.506          | 0.014 | -0.260     | 0.231 |
| Satisfaction                 | -0.154       | 0.355 | -0.460          | 0.004 | -0.088     | 0.600 |
| Masturbation                 | -0.441       | 0.059 | -0.360          | 0.130 | -0.310     | 0.197 |
| Relationship                 | -0.289       | 0.087 | -0.393          | 0.018 | -0.232     | 0.174 |
| Behavior                     | -0.098       | 0.690 | -0.147          | 0.548 | 0.158      | 0.519 |
| Problems men                 | -0.065       | 0.701 | -0.221          | 0.189 | 0.031      | 0.856 |

Table 8. Bivariate association of anxiety, depression and body image score with SFQ scores in women at follow-up

|                      | HADS anxiety |       | HADS depression |       | Body image |       |
|----------------------|--------------|-------|-----------------|-------|------------|-------|
|                      | Coeff.       | P     | Coeff.          | P     | Coeff.     | P     |
| HADS anxiety         | 1.0          |       | 0.526           | 0.007 | 0.155      | 0.585 |
| HADS depression      | 0.526        | 0.007 | 1.0             |       | 0.217      | 0.297 |
| Body image           | 0.115        | 0.585 | 0.217           | 0.297 | 1.0        |       |
| <b>SFQ subscales</b> |              |       |                 |       |            |       |
| Overall              | 0.191        | 0.393 | 0.280           | 0.206 | -0.166     | 0.607 |
| Interest             | 0.207        | 0.321 | 0.277           | 0.180 | -0.328     | 0.109 |
| Desire               | -0.204       | 0.503 | -0.132          | 0.677 | 0.109      | 0.724 |
| Arousal              | 0.401        | 0.100 | 0.629           | 0.005 | -0.082     | 0.745 |
| Orgasm               | 0.070        | 0.812 | 0.098           | 0.739 | 0.276      | 0.340 |
| Satisfaction         | 0.053        | 0.802 | 0.238           | 0.253 | -0.277     | 0.180 |
| Masturbation         | 0.243        | 0.498 | 0.450           | 0.192 | 0.094      | 0.797 |
| Relationship         | 0.084        | 0.704 | 0.191           | 0.382 | -0.061     | 0.781 |
| Behavior             | 0.371        | 0.291 | 0.415           | 0.233 | -0.161     | 0.657 |
| Problems women       | -0.163       | 0.479 | -0.080          | 0.729 | 0.090      | 0.700 |
